# Supplementary material for: Understanding adherence to the recording of ecological momentary assessments in the example of tinnitus monitoring
Source: PubMed Central journal article supplement (PMC7775469; doi:10.1038/s41598-020-79527-0), 2020-12-31
Supplement: 41598_2020_79527_MOESM1_ESM.pdf [file 41598_2020_79527_MOESM1_ESM.pdf]

## – Supplementary Material –

# Understanding Adherence to the Recording of Ecological Momentary Assessments on the Example of Tinnitus Monitoring

Miro Schleicher<sup>1,\*</sup>, Vishnu Unnikrishnan<sup>1</sup>, Jorge Simoes<sup>2</sup>, Patrick Neff<sup>2,3</sup>, Thomas Probst<sup>4</sup>, Rüdiger Pryss<sup>5</sup>, Winfried Schlee<sup>2</sup>, and Myra Spiliopoulou<sup>1</sup>

<sup>1</sup>Institute of Technical and Business Information Systems, Otto-von-Guericke-University Magdeburg, Germany

<sup>2</sup>Department of Psychiatry and Psychotherapy of Regensburg University, Regensburg, Germany

<sup>3</sup>University Research Priority Program ‘Dynamics of Healthy Aging’, University of Zurich, Zurich, Switzerland

<sup>4</sup>Department for Psychotherapy and Biopsychosocial Health, Danube University Krems, Austria

<sup>5</sup>Institute of Clinical Epidemiology and Biometry, University of Würzburg, Würzburg, Germany

\*Contact author: miro.schleicher@ovgu.de

### Supplementary A: Translation of the MiniTF questionnaire items

The items of the MiniTF are depicted on Table 1, where we used a translation by Probst et al<sup>1</sup>. The answers to the questionnaire items are True (2 points), Partially True (1 point), Not True (0 points). MiniTF is used to derive a global score, ranging between 0 and 24 points. Higher values indicate higher severity (distress). Scores below 7 are of no pathological relevance.

| Item | Translation of the German Question                                                 |
|------|------------------------------------------------------------------------------------|
| tf1  | I am aware of the noises from the moment I get up to the moment I sleep            |
| tf2  | Because of the noises I worry that there is something seriously wrong with my body |
| tf3  | If the noises continue my life will not be worth living                            |
| tf4  | I am more irritable with my family and friends because of the noises               |
| tf5  | I worry that the noises might damage my physical health                            |
| tf6  | I find it harder to relax because of the noises                                    |
| tf7  | My noises are often so bad that I cannot ignore them                               |
| tf8  | It takes me longer to get to sleep because of the noises                           |
| tf9  | I am more liable to feel low because of the noises                                 |
| tf10 | I often think about whether the noises will ever go away                           |
| tf11 | I am a victim of my noises                                                         |
| tf12 | The noises have affected my concentration                                          |

**Table 1.** The translated items of the German MiniTF questionnaire of Hiller et al<sup>2</sup>; translation by Probst et al<sup>1</sup>

### Supplementary B: Classification results on time series data of D[1292:852]

On Table 2 we see the accuracy achieved by each of the first 6 out of 13 algorithms for each EMA variable; on Table 3 we see the accuracy values for the remaining 7 algorithms. By taking apart the accuracy values for the individual variables, we can assess their contribution to separation between the two classes.

| Algorithm          | EMA item | value of <i>FirstDays</i> |      |      |      |      |      |      |      |      |            |
|--------------------|----------|---------------------------|------|------|------|------|------|------|------|------|------------|
|                    |          | 1                         | 2    | 3    | 4    | 5    | 6    | 7    | 8    | 9    | 10 or more |
| ST                 | q1       | -                         | -    | 0.71 | 0.61 | 0.65 | 0.92 | 0.92 | 0.75 | 0.94 | 0.36       |
|                    | q2       | -                         | -    | 0.61 | 0.67 | 0.62 | 0.5  | 0.92 | 0.92 | 0.95 | 0.61       |
|                    | q3       | -                         | -    | 0.53 | 0.52 | 0.76 | 0.92 | 0.92 | 0.92 | 0.94 | 0.56       |
|                    | q4       | -                         | -    | 0.65 | 0.55 | 0.72 | 0.67 | 0.92 | 0.92 | 0.95 | 0.5        |
|                    | q5       | -                         | -    | 0.62 | 0.83 | 0.71 | 0.92 | 0.92 | 0.83 | 0.89 | 0.58       |
|                    | q6       | -                         | -    | 0.68 | 0.59 | 0.47 | 0.92 | 0.92 | 0.92 | 0.89 | 0.55       |
|                    | q7       | -                         | -    | 0.61 | 0.68 | 0.75 | 0.92 | 0.92 | 0.92 | 0.94 | 0.59       |
| TSF                | q1       | 0.84                      | 0.61 | 0.61 | 0.74 | 0.71 | 0.92 | 0.92 | 0.92 | 0.94 | 0.55       |
|                    | q2       | 0.69                      | 0.58 | 0.65 | 0.5  | 0.69 | 0.58 | 0.92 | 0.92 | 0.95 | 0.48       |
|                    | q3       | 0.63                      | 0.55 | 0.6  | 0.48 | 0.71 | 0.83 | 0.92 | 0.83 | 0.83 | 0.5        |
|                    | q4       | 0.77                      | 0.52 | 0.48 | 0.64 | 0.78 | 0.83 | 0.92 | 0.92 | 0.95 | 0.5        |
|                    | q5       | 0.76                      | 0.61 | 0.69 | 0.61 | 0.76 | 0.92 | 0.92 | 0.92 | 0.95 | 0.55       |
|                    | q6       | 0.68                      | 0.54 | 0.54 | 0.55 | 0.71 | 0.58 | 0.92 | 0.83 | 0.94 | 0.48       |
|                    | q7       | 0.64                      | 0.6  | 0.61 | 0.55 | 0.56 | 0.75 | 0.92 | 0.92 | 0.78 | 0.56       |
| EE                 | q1       | -                         | 0.54 | 0.52 | 0.74 | 0.82 | 0.92 | 0.92 | 0.92 | 0.89 | 0.55       |
|                    | q2       | -                         | 0.58 | 0.68 | 0.5  | 0.69 | 0.75 | 0.92 | 0.92 | 0.89 | 0.64       |
|                    | q3       | -                         | 0.47 | 0.57 | 0.39 | 0.71 | 0.92 | 0.92 | 0.83 | 0.83 | 0.5        |
|                    | q4       | -                         | 0.48 | 0.42 | 0.59 | 0.72 | 0.67 | 0.92 | 0.92 | 0.95 | 0.53       |
|                    | q5       | -                         | 0.66 | 0.62 | 0.61 | 0.71 | 0.92 | 0.92 | 0.92 | 0.89 | 0.48       |
|                    | q6       | -                         | 0.54 | 0.43 | 0.68 | 0.76 | 0.75 | 0.92 | 0.83 | 0.94 | 0.48       |
|                    | q7       | -                         | 0.45 | 0.58 | 0.64 | 0.69 | 0.75 | 0.92 | 0.92 | 0.78 | 0.53       |
| MSM                | q1       | 0.84                      | 0.54 | 0.48 | 0.74 | 0.65 | 0.92 | 0.92 | 0.92 | 0.89 | 0.48       |
|                    | q2       | 0.73                      | 0.58 | 0.65 | 0.5  | 0.75 | 0.92 | 0.92 | 0.92 | 0.84 | 0.61       |
|                    | q3       | 0.73                      | 0.48 | 0.57 | 0.39 | 0.82 | 0.92 | 0.92 | 0.83 | 0.83 | 0.44       |
|                    | q4       | 0.79                      | 0.48 | 0.48 | 0.59 | 0.67 | 0.58 | 0.92 | 0.92 | 0.95 | 0.5        |
|                    | q5       | 0.76                      | 0.63 | 0.59 | 0.52 | 0.65 | 0.85 | 0.92 | 0.92 | 0.95 | 0.45       |
|                    | q6       | 0.72                      | 0.56 | 0.5  | 0.68 | 0.76 | 0.75 | 0.92 | 0.83 | 0.89 | 0.42       |
|                    | q7       | 0.73                      | 0.45 | 0.55 | 0.64 | 0.69 | 0.75 | 0.92 | 0.92 | 0.72 | 0.5        |
| CID <sub>DTW</sub> | q1       | 0.84                      | 0.61 | 0.61 | 0.7  | 0.82 | 0.92 | 0.92 | 0.92 | 0.89 | 0.58       |
|                    | q2       | 0.73                      | 0.56 | 0.65 | 0.5  | 0.75 | 0.83 | 0.92 | 0.92 | 0.89 | 0.52       |
|                    | q3       | 0.73                      | 0.5  | 0.57 | 0.39 | 0.76 | 0.92 | 0.92 | 0.83 | 0.78 | 0.5        |
|                    | q4       | 0.79                      | 0.53 | 0.55 | 0.59 | 0.72 | 0.67 | 0.92 | 0.83 | 0.95 | 0.56       |
|                    | q5       | 0.76                      | 0.63 | 0.59 | 0.61 | 0.71 | 0.85 | 0.92 | 0.83 | 0.89 | 0.58       |
|                    | q6       | 0.72                      | 0.54 | 0.54 | 0.68 | 0.76 | 0.67 | 0.92 | 0.83 | 0.89 | 0.35       |
|                    | q7       | 0.73                      | 0.44 | 0.55 | 0.59 | 0.62 | 0.67 | 0.92 | 0.92 | 0.72 | 0.53       |
| DTD <sub>C</sub>   | q1       | 0.84                      | 0.62 | 0.65 | 0.78 | 0.65 | 0.92 | 0.92 | 0.92 | 0.89 | 0.55       |
|                    | q2       | 0.73                      | 0.61 | 0.68 | 0.5  | 0.69 | 0.75 | 0.92 | 0.92 | 0.89 | 0.67       |
|                    | q3       | 0.73                      | 0.5  | 0.57 | 0.39 | 0.65 | 0.92 | 0.92 | 0.83 | 0.83 | 0.47       |
|                    | q4       | 0.79                      | 0.53 | 0.58 | 0.59 | 0.67 | 0.58 | 0.92 | 0.92 | 0.95 | 0.53       |
|                    | q5       | 0.76                      | 0.61 | 0.62 | 0.61 | 0.65 | 0.92 | 0.92 | 0.83 | 0.79 | 0.48       |
|                    | q6       | 0.72                      | 0.54 | 0.43 | 0.64 | 0.76 | 0.75 | 0.92 | 0.83 | 0.94 | 0.48       |
|                    | q7       | 0.73                      | 0.44 | 0.58 | 0.64 | 0.69 | 0.67 | 0.92 | 0.92 | 0.72 | 0.56       |

**Table 2.** Accuracy (Return=Yes/No) of each time series classifier in dependence of *FirstDays* value (columns) and EMA item (row), for a horizon of observations of 30 days and a cut-off  $\tau = 9$  days - first 6 of the classification algorithms

| Algorithm         | EMA item | value of <i>FirstDays</i> |      |      |      |      |      |      |      |      |            |
|-------------------|----------|---------------------------|------|------|------|------|------|------|------|------|------------|
|                   |          | 1                         | 2    | 3    | 4    | 5    | 6    | 7    | 8    | 9    | 10 or more |
| DD <sub>DTW</sub> | q1       | 0.84                      | 0.61 | 0.65 | 0.74 | 0.71 | 0.92 | 0.92 | 0.92 | 0.89 | 0.52       |
|                   | q2       | 0.81                      | 0.56 | 0.65 | 0.67 | 0.69 | 0.83 | 0.92 | 0.92 | 0.89 | 0.58       |
|                   | q3       | 0.81                      | 0.48 | 0.53 | 0.39 | 0.76 | 0.92 | 0.92 | 0.83 | 0.94 | 0.47       |
|                   | q4       | 0.82                      | 0.47 | 0.58 | 0.59 | 0.67 | 0.58 | 0.92 | 0.83 | 0.9  | 0.5        |
|                   | q5       | 0.81                      | 0.61 | 0.62 | 0.61 | 0.71 | 0.85 | 0.92 | 0.83 | 0.95 | 0.55       |
|                   | q6       | 0.8                       | 0.52 | 0.43 | 0.68 | 0.53 | 0.92 | 0.92 | 0.92 | 0.94 | 0.35       |
|                   | q7       | 0.81                      | 0.44 | 0.55 | 0.64 | 0.69 | 0.67 | 0.92 | 0.92 | 0.72 | 0.47       |
| DTW               | q1       | 0.84                      | 0.54 | 0.48 | 0.7  | 0.76 | 0.92 | 0.92 | 0.92 | 0.89 | 0.48       |
|                   | q2       | 0.73                      | 0.61 | 0.68 | 0.5  | 0.69 | 0.75 | 0.92 | 0.92 | 0.89 | 0.67       |
|                   | q3       | 0.73                      | 0.47 | 0.57 | 0.39 | 0.65 | 0.92 | 0.92 | 0.83 | 0.83 | 0.47       |
|                   | q4       | 0.79                      | 0.48 | 0.45 | 0.59 | 0.67 | 0.58 | 0.92 | 0.83 | 0.95 | 0.53       |
|                   | q5       | 0.76                      | 0.63 | 0.62 | 0.61 | 0.65 | 0.92 | 0.92 | 0.83 | 0.95 | 0.55       |
|                   | q6       | 0.72                      | 0.54 | 0.43 | 0.68 | 0.76 | 0.75 | 0.92 | 0.83 | 0.94 | 0.48       |
|                   | q7       | 0.73                      | 0.44 | 0.58 | 0.64 | 0.69 | 0.67 | 0.92 | 0.92 | 0.72 | 0.56       |
| RotF              | q1       | 0.84                      | 0.52 | 0.71 | 0.7  | 0.71 | 0.92 | 0.92 | 0.92 | 0.94 | 0.52       |
|                   | q2       | 0.81                      | 0.53 | 0.61 | 0.71 | 0.75 | 0.92 | 0.92 | 0.92 | 0.95 | 0.55       |
|                   | q3       | 0.81                      | 0.53 | 0.63 | 0.7  | 0.76 | 0.92 | 0.92 | 0.92 | 0.94 | 0.59       |
|                   | q4       | 0.82                      | 0.6  | 0.52 | 0.68 | 0.78 | 0.92 | 0.92 | 0.92 | 0.95 | 0.53       |
|                   | q5       | 0.81                      | 0.58 | 0.69 | 0.65 | 0.76 | 0.92 | 0.92 | 0.92 | 0.95 | 0.61       |
|                   | q6       | 0.8                       | 0.56 | 0.57 | 0.68 | 0.76 | 0.92 | 0.92 | 0.92 | 0.94 | 0.58       |
|                   | q7       | 0.81                      | 0.52 | 0.68 | 0.68 | 0.75 | 0.92 | 0.92 | 0.92 | 0.94 | 0.59       |
| RandF             | q1       | 0.84                      | 0.59 | 0.65 | 0.74 | 0.76 | 0.92 | 0.92 | 0.92 | 0.94 | 0.55       |
|                   | q2       | 0.81                      | 0.54 | 0.61 | 0.71 | 0.75 | 0.92 | 0.92 | 0.92 | 0.95 | 0.55       |
|                   | q3       | 0.83                      | 0.55 | 0.63 | 0.7  | 0.76 | 0.92 | 0.92 | 0.92 | 0.94 | 0.59       |
|                   | q4       | 0.82                      | 0.55 | 0.48 | 0.68 | 0.78 | 0.92 | 0.92 | 0.92 | 0.95 | 0.53       |
|                   | q5       | 0.76                      | 0.58 | 0.52 | 0.57 | 0.71 | 0.92 | 0.92 | 0.92 | 0.95 | 0.55       |
|                   | q6       | 0.77                      | 0.57 | 0.57 | 0.68 | 0.76 | 0.92 | 0.92 | 0.92 | 0.94 | 0.58       |
|                   | q7       | 0.81                      | 0.55 | 0.65 | 0.68 | 0.75 | 0.92 | 0.92 | 0.92 | 0.94 | 0.59       |
| C45               | q1       | 0.84                      | 0.52 | 0.61 | 0.7  | 0.76 | 0.92 | 0.92 | 0.92 | 0.94 | 0.55       |
|                   | q2       | 0.81                      | 0.54 | 0.61 | 0.71 | 0.75 | 0.92 | 0.92 | 0.92 | 0.95 | 0.58       |
|                   | q3       | 0.81                      | 0.53 | 0.63 | 0.7  | 0.76 | 0.92 | 0.92 | 0.92 | 0.94 | 0.59       |
|                   | q4       | 0.82                      | 0.53 | 0.61 | 0.68 | 0.78 | 0.92 | 0.92 | 0.92 | 0.95 | 0.56       |
|                   | q5       | 0.81                      | 0.52 | 0.59 | 0.7  | 0.76 | 0.92 | 0.92 | 0.92 | 0.95 | 0.58       |
|                   | q6       | 0.8                       | 0.52 | 0.61 | 0.68 | 0.76 | 0.92 | 0.92 | 0.92 | 0.94 | 0.58       |
|                   | q7       | 0.81                      | 0.53 | 0.61 | 0.68 | 0.75 | 0.92 | 0.92 | 0.92 | 0.94 | 0.59       |
| NB                | q1       | 0.84                      | 0.57 | 0.61 | 0.65 | 0.65 | 0.75 | 0.75 | 0.83 | 0.72 | 0.55       |
|                   | q2       | 0.81                      | 0.54 | 0.68 | 0.33 | 0.44 | 0.17 | 0.17 | 0.08 | 0.11 | 0.48       |
|                   | q3       | 0.81                      | 0.55 | 0.63 | 0.3  | 0.53 | 0.25 | 0.08 | 0.25 | 0    | 0.47       |
|                   | q4       | 0.82                      | 0.47 | 0.55 | 0.68 | 0.83 | 0.5  | 0.75 | 0.58 | 0.7  | 0.66       |
|                   | q5       | 0.81                      | 0.55 | 0.69 | 0.74 | 0.53 | 0.62 | 0.75 | 0.58 | 0.74 | 0.58       |
|                   | q6       | 0.8                       | 0.57 | 0.57 | 0.41 | 0.24 | 0.25 | 0.08 | 0.08 | 0.06 | 0.39       |
|                   | q7       | 0.81                      | 0.55 | 0.71 | 0.36 | 0.38 | 0.17 | 0.23 | 0.08 | 0.06 | 0.41       |
| ED                | q1       | 0.84                      | 0.62 | 0.68 | 0.78 | 0.65 | 0.92 | 0.92 | 0.83 | 0.83 | 0.52       |
|                   | q2       | 0.73                      | 0.61 | 0.68 | 0.5  | 0.69 | 0.75 | 0.92 | 0.92 | 0.84 | 0.67       |
|                   | q3       | 0.73                      | 0.48 | 0.57 | 0.39 | 0.65 | 0.92 | 0.92 | 0.83 | 0.83 | 0.47       |
|                   | q4       | 0.79                      | 0.53 | 0.58 | 0.64 | 0.78 | 0.42 | 0.83 | 0.92 | 0.95 | 0.56       |
|                   | q5       | 0.76                      | 0.63 | 0.62 | 0.57 | 0.65 | 0.92 | 0.92 | 0.83 | 0.84 | 0.52       |
|                   | q6       | 0.72                      | 0.54 | 0.43 | 0.64 | 0.76 | 0.75 | 0.92 | 0.83 | 0.94 | 0.55       |
|                   | q7       | 0.73                      | 0.44 | 0.61 | 0.64 | 0.69 | 0.67 | 0.92 | 0.92 | 0.78 | 0.5        |

**Table 3.** Accuracy (Return=Yes/No) of each time series classifier in dependence of *FirstDays* value (columns) and EMA item (row), for a horizon of observations of 30 days and a cut-off  $\tau_{early} = 9$  days - last 7 of the classification algorithms

## References

1. Probst, T., Pryss, R., Langguth, B. & Schlee, W. Emotion dynamics and tinnitus: Daily life data from the "trackyourtinnitus" application. *Sci. reports* **6** (2016).
2. Hiller, W. & Goebel, G. Rapid assessment of tinnitus-related psychological distress using the mini-tq. *Int. J. Audiol.* **43**, 600–604 (2004).
